# Supplementary material for: Metformin inhibits cell cycle progression of B-cell chronic lymphocytic leukemia cells
Source: PubMed Central journal article supplement (PMC4673187; doi:10.18632/oncotarget.4168), 2015-06-05
Supplement: oncotarget-06-22624-s001.pdf [file oncotarget-06-22624-s001.pdf]

## SUPPLEMENTARY TABLES

Supplementary Table S1: CLL patient characteristics

| Sample | Isotype | MUTATION | Rai stage | Treatment *                     | TTFT (months) | Alive/Dead **             | OS (months) | % of VH mutations | % of VL mutations | CD38 pos-neg |
|--------|---------|----------|-----------|---------------------------------|---------------|---------------------------|-------------|-------------------|-------------------|--------------|
| G025   | μ       | M-CLL    | 3         | 1                               | 48            | 1                         | 161,6       | 8,3               | 5                 | 1            |
| G062   | μ       | M-CLL    | –         | 0                               | –             | 1                         | 170         | 2,1               | 0,7               | 0            |
| G085   | μ       | M-CLL    | 0         | 1                               | 10            | 1                         | 37          | 9                 | 5                 | 0            |
| G087   | γ       | M-CLL    | 0         | 1                               | 12            | 1                         | 54          | 7,6               | 5,4               | 1            |
| G110   | μ       | M-CLL    | 0         | 1                               | 60            | 0                         | 80          | 6,7               | 2,4               | 1            |
| G117   | μ       | U-CLL    | 0         | 0                               | –             | 0                         | 52          |                   |                   | 1            |
|        |         |          |           | * 1 = treated;<br>0 = untreated |               | ** 1 = dead; 0 =<br>alive |             |                   |                   |              |

  

| Sample | VH gene | D gene  | D gene rf | JH gene | VL gene   | JL gene  |
|--------|---------|---------|-----------|---------|-----------|----------|
| G025   | 3–7     | 5–12    |           | 5       | K3–15     | 1        |
| G062   | 3–23    | 3–22    |           | 5       | K3–15     | 1        |
| G085   | 3–7*01  | 2–2*01  | 2         | 3*02    | KV1–6*01  | IGKJ3*01 |
| G087   | 3–23*01 | 2–15*01 | 2         | 4*02    | KV1–39*01 | IGKJ4*01 |
| G110   | 4–34*01 | 3–16*01 | 1         | 4*02    | LV1–40*01 | IGLJ1*01 |
